# Supplementary material for: Partnerschap met gezinnen in armoede op beleids- of programmaniveau
Source: Springer Nature journal article supplement (doi:10.1007/s12508-021-00307-w), 2021-07-14
Supplement: MOESM1 [file 19362056]

**Supplement 1**

**Een ‘goed’ project voor Gezonde toekomst dichterbij: checklist van moeders/gezinnen**

**1. Worden gezinnen (moeders, vaders, kinderen) er ‘gezonder’ van?**

a. Fitter

b. Beter voelen

1. **Wat levert het gezinnen (moeders, vaders, kinderen) het nog iets anders op?**

a. Plezier

b. Ertoe doen

c. *Me-time*

d. Ergens bij horen

1. **Is het project ‘goed’ opgezet (basis)?**

a. Inspelen op wat gezinnen nodig hebben

b. Doorgaan als subsidie stopt

c. Bereik gezinnen

d. Samen met ervaringsdeskundigen

e. Houding professionals ten opzichte van gezinnen

f. Vertrouwen projectleider/organisatie

g. Uniek in de wijk

1. **Wordt het project ‘goed’ uitgevoerd?**

a. Gelijkwaardige samenwerking gezinnen

b. Erkenning en beloning ervaringsdeskundigen

c. Open en eerlijk over project

d. Verwachtingen duidelijk

e. Geen problemen voor deelnemers als het stopt (uitkering, enzovoort)

f. Respect naar gezinnen

1. **Communiceert het project ‘goed’?**

a. Passende teksten en plaatjes

b. Passende manier van communiceren (vragenlijst, interview, Facebook, e-mails, enzovoort)

c. Duidelijke termen (certificaat, training)

Bij gebruik graag verwijzen naar: Groot B, Teunissen T. Een ‘goed’ project voor Gezonde toekomst dichterbij: checklist van moeders/gezinnen. 2020. Beschikbaar via: <https://www.fnozorgvoorkansen.nl/wp-content/uploads/2020/12/Criteriawaaier-versie-1-14-01-2020-KBG.pdf>.

**Een ‘goed’ project voor Gezonde toekomst dichterbij: checklist van moeders/gezinnen**

1. **Worden gezinnen (moeders, vaders, kinderen) er ‘gezonder’ van?**

a. *Fitter*: minder vet en suiker, meer bewegen, dunner

b. *Beter voelen*: meer zelfvertrouwen, minder depressief, beter voelen, minder stress

1. **Wat levert het gezinnen (moeders, vaders, kinderen) het nog iets anders op?**

a. *Plezier*: lachen, leuk hebben, fijn voelen, gewaardeerd worden

b. *Ertoe doen*: meer naar buiten, een plek om heen te gaan, activiteiten, (vrijwilligers)werk

c. *Me-time*: iets voor jezelf doen (vooral voor moeders)

d. *Ergens bij horen*: nieuwe mensen leren kennen, contacten, netwerk

1. **Is het project ‘goed’ opgezet (basis)?**

a. *Inspelen op wat gezinnen nodig hebben*: heeft het project een goede focus?

b. *Doorgaan als subsidie stopt*: wat gebeurt er dan?

c. *Bereik gezinnen*: is de aanpak om gezinnen te bereiken passend?

d. *Samen met ervaringsdeskundigen*: welke rol hebben ervaringsdeskundigen of vrijwilligers?

e. *Houding professionals ten opzichte van gezinnen*: kunnen/willen professionals samenwerken met gezinnen?

f. *Vertrouwen projectleider/organisatie*: heb je het gevoel dat deze partij een goed project kan opzetten?

g. *Uniek in de wijk*: is het project anders/beter dan andere projecten in de wijk?

1. **Wordt het project ‘goed’ uitgevoerd?**
2. *Gelijkwaardige samenwerking gezinnen*: hoe ervaart de ervaringsdeskundige, de vrijwilliger of het gezinslid dit?
3. *Erkenning en beloning ervaringsdeskundigen*: worden ervaringsdeskundigen en vrijwilligers passend erkend en beloond?
4. *Open en eerlijk over project*: is er sprake van openheid over hoe het project uitgevoerd wordt (geen misleiding, geen schijn)? Ook over de voortgang en successen en mislukkingen in het project naar buiten toe?
5. *Verwachtingen duidelijk*: wordt er tegen gezinnen duidelijk gezegd wat ze kunnen verwachten? Wordt dat ook herhaald tijdens het project?
6. *Geen problemen voor deelnemers als het stopt (uitkering, enzovoort)*: komen mensen niet in de problemen als het stopt? Of als ze meedoen? Worden mensen niet ‘gebruikt’?
7. *Respect naar gezinnen*: worden gezinnen in hun waarde gelaten, geen betutteling of kleinering?
8. **Communiceert het project ‘goed’?**
9. *Passende teksten en plaatjes:* passen de foto’s/plaatjes en teksten/woorden bij gezinnen (niet kleinerend, onbegrijpelijk, respectloos)
10. *Manier van communiceren:* past de manier van communiceren (een vragenlijst, een interview, FaceBook, e-mails, enzovoort) bij gezinnen?
11. *Duidelijke termen:* gebruikt men woorden die kloppen met de betekenis die gezinnen eraan geven (voorbeeld: certificaat (als het bewijs van deelname is)), training (als het mailtjes zijn)?
