# Supplementary material for: Partnerschap met gezinnen in armoede op beleids- of programmaniveau
Source: Springer Nature journal article supplement (doi:10.1007/s12508-021-00307-w), 2021-07-14
Supplement: MOESM2 [file 19362056]

**Supplement 2**

**Beoordelingsformulier ‘Samen Kansrijk en Gezond’**

**Naam beoordelaar**:

Ik verklaar dat er met betrekking tot deze projectaanvraag geen sprake is van belangenverstrengeling (‘conflict of interest’) en stem ermee in dit projectvoorstel vertrouwelijk te behandelen.

**Projecttitel**:

**Projectaanvraagnummer**:

**Naam hoofdaanvrager:**

**Totaal score van het projectvoorstel**:

[zie beoordelingsrichtlijn; getal 1-6 met maximaal 1 decimaal]

**Samenvattend oordeel en toelichting op de score:**

**Advies: onder welke voorwaarden is een eventuele toekenning mogelijk?**

**Opmerkingen bij het Projectvoorstel, ter onderbouwing van het gegeven totaalcijfer**

| *Onderdeel* | *Opmerkingen en bijzonderheden* |
| --- | --- |
| **Betrokkenheid gezinnen**  *Het is duidelijk hoe gezinnen vanaf het begin zijn betrokken en richting hebben gegeven.* | Wat is niet duidelijk?  Wat is juist goed? |
| **Doeltreffendheid**  *Denk je dat gezinnen zich op dat gebied beter zullen voelen door toedoen van dit project?* | Ja/nee/beetje, omdat… |
| **Wat levert het de gezinnen vooral op, denk je?** Bijvoorbeeld:  *a. Plezier*  *b. Ertoe doen*  *c. Me-time*  *d. Ergens bij horen* | Wat denk jij dat het oplevert? |
| **Is de aanpak goed opgezet?** *Denk aan:*  *a. Speelt het in op wat gezinnen nodig hebben?*  *b. Hebben ze een goed plan om gezinnen te bereiken?*  *c. Is er samenwerking met gezinnen of ervaringsdeskundigen?*  *d. Is er aandacht voor de verhouding tussen professionals en gezinnen?*  *e. Heb je vertrouwen in de projectleider en organisatie(s)?* | Wat valt op? |
| **Het is duidelijk waarom de aanpak op de gekozen plek van waarde is.** *Bijvoorbeeld:*   1. *Het is duidelijk dat hier veel problemen zijn.* 2. *Men werkt goed samen met andere lokale organisaties.* 3. *Men gaat door als de subsidie stopt.* | Ja/nee, omdat… |
| **Wordt de aanpak ‘goed’ uitgevoerd?**  *a. Gelijkwaardige samenwerking gezinnen*  *b. Erkenning en beloning ervaringsdeskundigen*  *c. Open en eerlijk over project*  *d. Verwachtingen duidelijk*  *e. Geen problemen voor deelnemers als het stopt (uitkering, enzovoort)*  *f. Respect naar gezinnen* | Ja/nee, omdat… |
| **Filmpje en de samenvatting**  *Zijn duidelijk en sluiten goed aan bij gezinnen die leven in kwetsbare situaties* | Ja/nee, omdat… |
| **Realistisch en haalbaar**  *De doelen lijken haalbaar en men maakt duidelijk hoe men leert en aanpast.* | Ja /nee, omdat… |

**Hartelijk dank voor het beoordelen van deze aanvraag!**
